# Supplementary material for: Proteomic Studies of Cholangiocarcinoma and Hepatocellular Carcinoma Cell Secretomes
Source: Hindawi journal article supplement (doi:10.1155/2010/437143), 2009-12-27
Supplement: f1 [file 437143.f1.pdf]

**Supplement Table 1.** Identified secreted proteins from Alexander, HepG2, SK-Hep-1 and HCC-S102 cell lines

| Cell lines | Bands | Accession numbers | Names                                                | Score | Peptide matches | Functions                         |
|------------|-------|-------------------|------------------------------------------------------|-------|-----------------|-----------------------------------|
| Alexander  | 1     | TTBK1_HUMAN       | Tau-tubulin kinase 1                                 | 46    | 1               | Metabolism                        |
|            |       | A2MG_HUMAN        | Alpha-2-macroglobulin                                | 71    | 7               | Protein synthesis and degradation |
|            |       | K1C10_HUMAN       | Keratin, type I cytoskeletal 10                      | 39    | 2               | Cytoskeleton/mobility             |
|            | 2     | K1C10_HUMAN       | Keratin, type I cytoskeletal 10                      | 80    | 5               | Cytoskeleton/mobility             |
|            |       | K2C1_HUMAN        | Keratin, type II cytoskeletal 1                      | 76    | 8               | Cytoskeleton/mobility             |
|            |       | ALBU_HUMAN        | Human serum albumin                                  | 70    | 3               | Transport/binding proteins        |
|            | 3     | K2C1_HUMAN        | Keratin, type II cytoskeletal 1                      | 95    | 6               | Cytoskeleton/mobility             |
|            |       | K1C10_HUMAN       | Keratin, type I cytoskeletal 10                      | 89    | 5               | Cytoskeleton/mobility             |
|            |       | K1C9_HUMAN        | Keratin, type I cytoskeletal 9                       | 39    | 3               | Cytoskeleton/mobility             |
|            |       | RAE1_HUMAN        | Rab proteins geranylgeranyltransferase component A 1 | 35    | 1               | Transport/binding proteins        |
|            |       | ALBU_HUMAN        | Human serum albumin                                  | 37    | 2               | Transport/binding proteins        |
|            | 4     | ALBU_HUMAN        | Human serum albumin                                  | 37    | 2               | Transport/binding proteins        |
|            |       | FINC_HUMAN        | Fibronectin                                          | 36    | 2               | Cytoskeleton/mobility             |
|            |       | CNGB3_HUMAN       | Cyclic nucleotide-gated cation channel beta-3        | 36    | 1               | Ion channels                      |
|            |       | CCL28_HUMAN       | C-C motif chemokine 28                               | 35    | 1               | Immunological response            |
|            | 5     | K2C1_HUMAN        | Keratin, type II cytoskeletal 1                      | 76    | 4               | Cytoskeleton/mobility             |
|            |       | K2C1B_HUMAN       | Keratin, type II cytoskeletal 1b                     | 45    | 2               | Cytoskeleton/mobility             |
|            |       | LOXH1_HUMAN       | Lipoxygenase homology domain-containing protein 1    | 35    | 1               | Transport/binding proteins        |
|            |       | ALBU_HUMAN        | Human serum albumin                                  | 38    | 2               | Transport/binding proteins        |
|            | 6     | ALBU_HUMAN        | Human serum albumin                                  | 38    | 3               | Transport/binding proteins        |
|            |       | A2MG_HUMAN        | Alpha-2-macroglobulin                                | 56    | 9               | Protein synthesis and degradation |
|            |       | K2C1_HUMAN        | Keratin, type II cytoskeletal 1                      | 91    | 1               | Cytoskeleton/mobility             |
|            |       | LG3BP_HUMAN       | Galectin-3-binding protein                           | 55    | 4               | Transport/binding proteins        |
|            | 7     | MYOZ2_HUMAN       | Myozenin-2                                           | 39    | 1               | Transport/binding proteins        |
|            |       | BGAT_HUMAN        | Histo-blood group ABO system transferase             | 38    | 1               | Metabolism                        |
|            |       | ALBU_HUMAN        | Human serum albumin                                  | 36    | 2               | Transport/binding proteins        |
|            |       | A2MG_HUMAN        | Alpha-2-macroglobulin                                | 37    | 1               | Protein synthesis and degradation |
|            | 8     | CERU_HUMAN        | Ceruloplasmin                                        | 40    | 2               | Transport/binding proteins        |
|            |       | SNX32_HUMAN       | Sorting nexin-32                                     | 37    | 1               | Transport/binding proteins        |
|            |       | K2C1_HUMAN        | Keratin, type II cytoskeletal 1                      | 44    | 2               | Cytoskeleton/mobility             |
|            | 9     | CNTN1_HUMAN       | Contactin-1                                          | 56    | 3               | Signal transduction               |
|            |       | NRCAM_HUMAN       | Neuronal cell adhesion molecule                      | 55    | 4               | Transport/binding proteins        |
|            |       | ALBU_HUMAN        | Human serum albumin                                  | 37    | 2               | Transport/binding proteins        |
|            | 10    | K2C1_HUMAN        | Keratin, type II cytoskeletal 1                      | 182   | 8               | Cytoskeleton/mobility             |

|    |  |              |                                                          |     |   |                                   |
|----|--|--------------|----------------------------------------------------------|-----|---|-----------------------------------|
|    |  | K1C10_HUMAN  | Keratin, type I cytoskeletal 10                          | 100 | 5 | Cytoskeleton/mobility             |
|    |  | LG3BP_HUMAN  | Galectin-3-binding protein                               | 42  | 4 | Transport/binding proteins        |
|    |  | CERU_HUMAN   | Ceruloplasmin                                            | 38  | 1 | Transport/binding proteins        |
|    |  | K1C9_HUMAN   | Keratin, type I cytoskeletal 9                           | 61  | 3 | Cytoskeleton/mobility             |
| 11 |  | Q2A130_HUMAN | Autogenous vein graft remodeling associated protein 5    | 39  | 1 | DNA replication/gene regulation   |
|    |  | LG3BP_HUMAN  | Galectin-3-binding protein                               | 41  | 2 | Transport/binding proteins        |
|    |  | ANKAR_HUMAN  | Ankyrin and armadillo repeat-containing protein          | 37  | 2 | Transport/binding proteins        |
| 12 |  | K1C9_HUMAN   | Keratin, type I cytoskeletal 9                           | 67  | 4 | Cytoskeleton/mobility             |
|    |  | LG3BP_HUMAN  | Galectin-3-binding protein                               | 120 | 8 | Transport/binding proteins        |
| 13 |  | Q13876_HUMAN | Bone-derived growth factor                               | 43  | 2 | Metabolism                        |
|    |  | K2C1_HUMAN   | Keratin, type II cytoskeletal 1                          | 38  | 2 | Cytoskeleton/mobility             |
|    |  | LG3BP_HUMAN  | Galectin-3-binding protein                               | 44  | 3 | Transport/binding proteins        |
|    |  | gi 119628058 | Mitochondrial trans-2-enoyl-CoA reductase, isoform CRA_a | 37  | 1 | Metabolism                        |
|    |  | LOXH1_HUMAN  | Lipoxygenase homology domain-containing protein 1        | 35  | 2 | Transport/binding proteins        |
| 14 |  | TRFE_HUMAN   | Serotransferrin                                          | 70  | 5 | Transport/binding proteins        |
|    |  | K2C1_HUMAN   | Keratin, type II cytoskeletal 1                          | 40  | 4 | Cytoskeleton/mobility             |
|    |  | RRAGB_HUMAN  | Ras-related GTP-binding protein B                        | 35  | 1 | Signal transduction               |
|    |  | CSN1_HUMAN   | COP9 signalosome complex subunit 1                       | 35  | 1 | Cell cycle                        |
| 15 |  | K2C1_HUMAN   | Keratin, type II cytoskeletal 1                          | 47  | 3 | Cytoskeleton/mobility             |
|    |  | K2C1B_HUMAN  | Keratin, type II cytoskeletal 1b                         | 43  | 2 | Cytoskeleton/mobility             |
|    |  | ERF1_HUMAN   | Eukaryotic peptide chain release factor subunit 1        | 36  | 1 | Protein synthesis and degradation |
|    |  | TRFE_HUMAN   | Serotransferrin                                          | 45  | 3 | Transport/binding proteins        |
|    |  | RGS14_HUMAN  | Regulator of G-protein signaling 14                      | 39  | 1 | Signal transduction               |
| 16 |  | K2C1_HUMAN   | Keratin, type II cytoskeletal 1                          | 39  | 3 | Cytoskeleton/mobility             |
|    |  | SNX32_HUMAN  | Sorting nexin-32                                         | 37  | 1 | Transport/binding proteins        |
|    |  | gi 119583243 | hCG1784572                                               | 39  | 1 | Unknown                           |
|    |  | MA2C1_HUMAN  | Alpha-mannosidase 2C1                                    | 35  | 1 | Metabolism                        |
| 17 |  | K2C1_HUMAN   | Keratin, type II cytoskeletal 1                          | 46  | 3 | Cytoskeleton/mobility             |
|    |  | Z780B_HUMAN  | Zinc finger protein 780B                                 | 39  | 1 | DNA replication/gene regulation   |
|    |  | IN80D_HUMAN  | INO80 complex subunit D                                  | 42  | 1 | DNA replication/gene regulation   |
|    |  | CNGB3_HUMAN  | Cyclic nucleotide-gated cation channel beta-3            | 36  | 1 | Ion channels                      |
|    |  | B3GT6_HUMAN  | Beta-1,3-galactosyltransferase 6                         | 38  | 1 | Metabolism                        |
| 18 |  | A1AT_HUMAN   | Alpha-1-antitrypsin                                      | 63  | 2 | Protein synthesis and degradation |
|    |  | ANGT_HUMAN   | Angiotensinogen                                          | 112 | 5 | Signal Transduction               |
|    |  | BGH3_HUMAN   | Transforming growth factor-beta-induced protein ig-h3    | 37  | 2 | Transport/binding proteins        |
|    |  | K2C1_HUMAN   | Keratin, type II cytoskeletal 1                          | 36  | 2 | Cytoskeleton/mobility             |
| 19 |  | AMBP_HUMAN   | Protein AMBP                                             | 46  | 1 | Protein synthesis and degradation |
|    |  | A1AT_HUMAN   | Alpha-1-antitrypsin                                      | 90  | 4 | Protein synthesis and degradation |

|    |              |                                                             |     |    |                                   |
|----|--------------|-------------------------------------------------------------|-----|----|-----------------------------------|
| 20 | AMBP_HUMAN   | Protein AMBP                                                | 46  | 1  | Protein synthesis and degradation |
|    | A1AT_HUMAN   | Alpha-1-antitrypsin                                         | 169 | 8  | Protein synthesis and degradation |
|    | HERC6_HUMAN  | Probable E3 ubiquitin-protein ligase HERC6                  | 42  | 1  | Protein synthesis and degradation |
|    | gi 119609527 | hCG1641439                                                  | 38  | 1  | Unknown                           |
| 21 | A1AT_HUMAN   | Alpha-1-antitrypsin                                         | 141 | 8  | Protein synthesis and degradation |
|    | NSUN4_HUMAN  | Putative methyltransferase NSUN4                            | 48  | 1  | Methyltransferase activity        |
|    | AMBP_HUMAN   | Protein AMBP                                                | 46  | 1  | Cell adhesion                     |
|    | ANGT_HUMAN   | Angiotensinogen                                             | 54  | 4  | Signal Transduction               |
|    | IDH3A_HUMAN  | Isocitrate dehydrogenase [NAD] subunit alpha, mitochondrial | 39  | 1  | Metabolism                        |
| 22 | A1AT_HUMAN   | Alpha-1-antitrypsin                                         | 231 | 8  | Protein synthesis and degradation |
|    | IDH3A_HUMAN  | Isocitrate dehydrogenase [NAD] subunit alpha, mitochondrial | 39  | 1  | Metabolism                        |
| 23 | AMBP_HUMAN   | Protein AMBP                                                | 58  | 3  | Protein synthesis and degradation |
|    | FIBB_HUMAN   | Fibrinogen beta chain                                       | 107 | 3  | Protein synthesis and degradation |
|    | ENOA_HUMAN   | Alpha-enolase                                               | 81  | 4  | Metabolism                        |
| 24 | AMBP_HUMAN   | Protein AMBP                                                | 46  | 1  | Protein synthesis and degradation |
|    | CBPN_HUMAN   | Carboxypeptidase N catalytic chain                          | 41  | 1  | Protein synthesis and degradation |
|    | K1C9_HUMAN   | Keratin, type I cytoskeletal 9                              | 38  | 1  | Cytoskeleton/mobility             |
|    | DAG1_HUMAN   | Dystroglycan                                                | 36  | 1  | Cytoskeleton/mobility             |
| 25 | K1C9_HUMAN   | Keratin, type I cytoskeletal 9                              | 45  | 2  | Cytoskeleton/mobility             |
|    | K2C1_HUMAN   | Keratin, type II cytoskeletal 1                             | 49  | 5  | Cytoskeleton/mobility             |
|    | AATC_HUMAN   | Aspartate aminotransferase, cytoplasmic                     | 45  | 3  | Metabolism                        |
|    | gi 28336     | Mutant beta-actin                                           | 43  | 4  | Cytoskeleton/mobility             |
|    | AMBP_HUMAN   | Protein AMBP                                                | 54  | 2  | Protein synthesis and degradation |
| 26 | APOE_HUMAN   | Apolipoprotein E                                            | 39  | 1  | Transport/binding proteins        |
|    | K1C18_HUMAN  | Keratin, type I cytoskeletal 18                             | 45  | 2  | Cytoskeleton/mobility             |
|    | RIF1_HUMAN   | Telomere-associated protein RIF1                            | 35  | 2  | Cell cycle                        |
|    | K2C1_HUMAN   | Keratin, type II cytoskeletal 1                             | 65  | 5  | Cytoskeleton/mobility             |
|    | DYH11_HUMAN  | Dynein heavy chain 11, axonemal                             | 39  | 3  | Cytoskeleton/mobility             |
| 27 | K2C1_HUMAN   | Keratin, type II cytoskeletal 1                             | 237 | 10 | Cytoskeleton/mobility             |
|    | K1C9_HUMAN   | Keratin, type I cytoskeletal 9                              | 122 | 8  | Cytoskeleton/mobility             |
|    | APOE_HUMAN   | Apolipoprotein E                                            | 46  | 2  | Transport/binding proteins        |
| 28 | AMBP_HUMAN   | Protein AMBP                                                | 46  | 1  | Protein synthesis and degradation |
|    | K1C9_HUMAN   | Keratin, type I cytoskeletal 9                              | 36  | 1  | Cytoskeleton/mobility             |
|    | K2C1_HUMAN   | Keratin, type II cytoskeletal 1                             | 68  | 5  | Cytoskeleton/mobility             |
|    | APOE_HUMAN   | Apolipoprotein E                                            | 38  | 2  | Transport/binding proteins        |
| 29 | AMBP_HUMAN   | Protein AMBP                                                | 52  | 1  | Protein synthesis and degradation |
|    | K2C1_HUMAN   | Keratin, type II cytoskeletal 1                             | 165 | 8  | Cytoskeleton/mobility             |
|    | K1C9_HUMAN   | Keratin type, I cytoskeletal 9                              | 61  | 4  | Cytoskeleton/mobility             |

|    |  |              |                                                         |     |    |                                   |
|----|--|--------------|---------------------------------------------------------|-----|----|-----------------------------------|
|    |  | K1C10_HUMAN  | Keratin type, I cytoskeletal 10                         | 81  | 8  | Cytoskeleton/mobility             |
|    |  | APOE_HUMAN   | Apolipoprotein E                                        | 144 | 4  | Transport/binding proteins        |
| 30 |  | AMBP_HUMAN   | Protein AMBP                                            | 108 | 3  | Protein synthesis and degradation |
|    |  | K1C18_HUMAN  | Keratin, type I cytoskeletal 18                         | 40  | 4  | Cytoskeleton/mobility             |
|    |  | G3P_HUMAN    | Glyceraldehyde-3-phosphate dehydrogenase                | 39  | 1  | Metabolism                        |
| 31 |  | AMBP_HUMAN   | Protein AMBP                                            | 78  | 3  | Protein synthesis and degradation |
|    |  | ANXA1_HUMAN  | Annexin A1                                              | 48  | 1  | Signal transduction               |
|    |  | CLUS_HUMAN   | Clusterin                                               | 58  | 3  | Transport/binding proteins        |
|    |  | 1433E_HUMAN  | 14-3-3 protein epsilon                                  | 39  | 1  | Signal transduction               |
|    |  | K2C8_HUMAN   | Keratin, type II cytoskeletal 8                         | 48  | 3  | Cytoskeleton/mobility             |
| 32 |  | K1C10_HUMAN  | Keratin, type I cytoskeletal 10                         | 70  | 8  | Cytoskeleton/mobility             |
|    |  | AMBP_HUMAN   | Protein AMBP                                            | 78  | 3  | Protein synthesis and degradation |
|    |  | K2C8_HUMAN   | Keratin, type II cytoskeletal 8                         | 39  | 1  | Cytoskeleton/mobility             |
|    |  | P12L1_HUMAN  | POM121-like protein 1                                   | 40  | 1  | Unknown                           |
| 33 |  | K1C10_HUMAN  | Keratin, type I cytoskeletal 10                         | 64  | 4  | Cytoskeleton/mobility             |
|    |  | K2C1_HUMAN   | Keratin, type II cytoskeletal 1                         | 50  | 5  | Cytoskeleton/mobility             |
|    |  | gi 119581427 | hCG1744108                                              | 47  | 1  | Unknown                           |
| 34 |  | K1C10_HUMAN  | Keratin, type I cytoskeletal 10                         | 172 | 10 | Cytoskeleton/mobility             |
|    |  | TPIS_HUMAN   | Triosephosphate isomerase                               | 92  | 3  | Metabolism                        |
|    |  | K1C9_HUMAN   | Keratin, type I cytoskeletal 9                          | 120 | 10 | Cytoskeleton/mobility             |
|    |  | BMS1_HUMAN   | Ribosome biogenesis protein BMS1 homolog                | 35  | 1  | Protein synthesis and degradation |
|    |  | Q59F02_HUMAN | Phosphomannomutase 2 variant                            | 39  | 1  | Metabolism                        |
|    |  | K22E_HUMAN   | Keratin, type II cytoskeletal 2 epidermal               | 159 | 6  | Cytoskeleton/mobility             |
|    |  | K2C8_HUMAN   | Keratin, type II cytoskeletal 8                         | 45  | 2  | Cytoskeleton/mobility             |
|    |  | AMBP_HUMAN   | Protein AMBP                                            | 36  | 1  | Protein synthesis and degradation |
| 35 |  | APOA1_HUMAN  | Apolipoprotein A-I                                      | 57  | 5  | Transport/binding proteins        |
|    |  | K1C9_HUMAN   | Keratin, type I cytoskeletal 9                          | 61  | 4  | Cytoskeleton/mobility             |
|    |  | APOE_HUMAN   | Apolipoprotein E                                        | 57  | 2  | Transport/binding proteins        |
|    |  | PSA2_HUMAN   | Proteasome subunit alpha type-2                         | 40  | 1  | Protein synthesis and degradation |
| 36 |  | GSTP1_HUMAN  | Glutathione S-transferase P                             | 95  | 3  | Metabolism                        |
|    |  | gi 119615628 | hCG17324, isoform CRA_b                                 | 36  | 1  | Unknown                           |
|    |  | gi 27368977  | Immunoglobulin kappa light chain variable region        | 37  | 1  | Immunological response            |
|    |  | gi 119568507 | Chromosome 6 open reading frame 173, isoform CRA_c      | 37  | 1  | DNA replication/gene regulation   |
|    |  | gi 129561187 | Alpha-helix coiled-coil rod homologue                   | 35  | 1  | DNA replication/gene regulation   |
| 37 |  | PEX14_HUMAN  | Peroxisomal membrane protein PEX14                      | 41  | 1  | Transport/binding proteins        |
| 38 |  | K2C1_HUMAN   | Keratin, type II cytoskeletal 1                         | 89  | 6  | Cytoskeleton/mobility             |
|    |  | K2C1B_HUMAN  | Keratin, type II cytoskeletal 1b                        | 40  | 2  | Cytoskeleton/mobility             |
|    |  | A2A391_HUMAN | Obscurin, cytoskeletal calmodulin and titin-interacting | 35  | 2  | Metabolism                        |

|    |              |                                                         |    |   |                                    |
|----|--------------|---------------------------------------------------------|----|---|------------------------------------|
|    |              | RhoGEF                                                  |    |   |                                    |
|    | WWP2_HUMAN   | NEDD4-like E3 ubiquitin-protein ligase WWP2             | 35 | 1 | Protein synthesis and degradation  |
|    | MYO9A_HUMAN  | Myosin-IXa                                              | 35 | 1 | Signal transduction                |
| 39 | PPIC_HUMAN   | Peptidyl-prolyl cis-trans isomerase C                   | 41 | 1 | Signal transduction                |
|    | K2C1_HUMAN   | Keratin, type II cytoskeletal 1                         | 38 | 1 | Cytoskeleton/mobility              |
|    | gi 119583243 | hCG1784572                                              | 37 | 1 | Unknown                            |
|    | gi 10637712  | Immunoglobulin lambda light chain variable region       | 35 | 1 | Immunological response             |
| 40 | TBC17_HUMAN  | TBC1 domain family member 17                            | 38 | 1 | Signal transduction                |
|    | PRDX1_HUMAN  | Peroxiredoxin-1                                         | 58 | 2 | Protection and detoxification      |
|    | BBS7_HUMAN   | Bardet-Biedl syndrome 7 protein                         | 35 | 1 | Transport/binding proteins         |
| 41 | S14L2_HUMAN  | SEC14-like protein 2                                    | 26 | 2 | DNA replication/gene regulation    |
|    | FAM3C_HUMAN  | Protein FAM3C                                           | 45 | 1 | Signal transduction                |
|    | GGCT_HUMAN   | Gamma-glutamyl cyclotransferase                         | 38 | 1 | Metabolism                         |
|    | gi 8895212   | Zinc finger DNA binding protein                         | 36 | 1 | DNA replication/gene regulation    |
| 42 | PPIB_HUMAN   | Peptidyl-prolyl cis-trans isomerase B                   | 40 | 1 | Signal transduction                |
|    | EGFR_HUMAN   | Epidermal growth factor receptor                        | 40 | 1 | Metabolism                         |
|    | K2C1_HUMAN   | Keratin, type II cytoskeletal 1                         | 48 | 2 | Cytoskeleton/mobility              |
|    | AHSA1_HUMAN  | Activator of 90 kDa heat shock protein ATPase homolog 1 | 37 | 1 | Chaperone/stress response          |
| 43 | CIDEA_HUMAN  | Cell death activator CIDE-A                             | 39 | 1 | Signal transduction                |
|    | PPIB_HUMAN   | Peptidyl-prolyl cis-trans isomerase B                   | 41 | 2 | Signal transduction                |
|    | K1C9_HUMAN   | Keratin, type I cytoskeletal 9                          | 38 | 2 | Cytoskeleton/mobility              |
|    | SODC_HUMAN   | Superoxide dismutase [Cu-Zn]                            | 42 | 1 | Protection and detoxification      |
| 44 | PPIB_HUMAN   | Peptidyl-prolyl cis-trans isomerase B                   | 61 | 4 | Signal transduction                |
| 45 | K22E_HUMAN   | Keratin, type II cytoskeletal 2 epidermal               | 43 | 2 | Cytoskeleton/mobility              |
|    | K1C9_HUMAN   | Keratin, type I cytoskeletal 9                          | 41 | 3 | Cytoskeleton/mobility              |
|    | K2C1_HUMAN   | Keratin, type II cytoskeletal 1                         | 55 | 7 | Cytoskeleton/mobility              |
|    | K1C10_HUMAN  | Keratin, type I cytoskeletal 10                         | 36 | 5 | Cytoskeleton/mobility Cytoskeleton |
| 46 | PROF1_HUMAN  | Profilin-1                                              | 47 | 2 | Cytoskeleton/mobility              |
|    | THIO_HUMAN   | Thioredoxin                                             | 41 | 1 | Protection and detoxification      |
|    | PPIA_HUMAN   | Peptidyl-prolyl cis-trans isomerase A                   | 38 | 1 | Signal transduction                |
| 47 | HBB_HUMAN    | Hemoglobin subunit beta                                 | 38 | 2 | Transport/binding proteins         |
|    | K1C9_HUMAN   | Keratin, type I cytoskeletal 9                          | 77 | 3 | Cytoskeleton/mobility              |
|    | LYSC_HUMAN   | Lysozyme C                                              | 38 | 1 | Protein synthesis and degradation  |
| 48 | K2C1_HUMAN   | Keratin, type II cytoskeletal 1                         | 45 | 4 | Cytoskeleton/mobility              |
|    | gi 119619136 | hCG1790904, isoform CRA_b                               | 40 | 2 | Unknown                            |
|    | HEM6_HUMAN   | Coproporphyrinogen-III oxidase, mitochondrial           | 36 | 1 | Metabolism                         |
|    | gi 182311    | Fructose-1,6-bisphosphatase                             | 35 | 1 | Metabolism                         |
| 49 | NEK3_HUMAN   | Serine/threonine-protein kinase Nek3                    | 36 | 1 | Cell cycle                         |

|              |    |                                                 |                                                         |      |                                   |                                   |
|--------------|----|-------------------------------------------------|---------------------------------------------------------|------|-----------------------------------|-----------------------------------|
|              |    | UBIQ_HUMAN                                      | Ubiquitin                                               | 42   | 3                                 | Protein synthesis and degradation |
|              |    | Q7Z2R6_HUMAN                                    | MSTP132                                                 | 35   | 1                                 | Unknown                           |
| <b>HepG2</b> | 1  | FINC_HUMAN                                      | Fibronectin                                             | 48   | 3                                 | Cytoskeleton/mobility             |
|              |    | DNLI3_HUMAN                                     | DNA ligase 3                                            | 36   | 1                                 | Cell cycle                        |
|              | 2  | FINC_HUMAN                                      | Fibronectin                                             | 70   | 7                                 | Cytoskeleton/mobility             |
|              |    | ITIH2_HUMAN                                     | Inter-alpha-trypsin inhibitor heavy chain H2            | 114  | 7                                 | Metabolism                        |
|              |    | RELN_HUMAN                                      | Reelin                                                  | 103  | 7                                 | Transport/binding proteins        |
|              | 3  | FINC_HUMAN                                      | Fibronectin                                             | 243  | 14                                | Cytoskeleton/mobility             |
|              | 4  | FINC_HUMAN                                      | Fibronectin                                             | 324  | 20                                | Cytoskeleton/mobility             |
|              | 5  | FINC_HUMAN                                      | Fibronectin                                             | 71   | 8                                 | Cytoskeleton/mobility             |
|              |    | AT8B4_HUMAN                                     | Probable phospholipid-transporting ATPase IM            | 39   | 1                                 | Metabolism                        |
|              |    | A2RQR4_HUMAN                                    | Reverse transcriptase-like protein                      | 38   | 1                                 | DNA replication/gene regulation   |
|              | 6  | FINC_HUMAN                                      | Fibronectin                                             | 70   | 8                                 | Cytoskeleton/mobility             |
|              |    | A2MG_HUMAN                                      | Alpha-2-macroglobulin                                   | 134  | 13                                | Protein synthesis and degradation |
|              | 7  | A2MG_HUMAN                                      | Alpha-2-macroglobulin                                   | 203  | 12                                | Protein synthesis and degradation |
|              | 8  | 2DMA_HUMAN                                      | HLA class II histocompatibility antigen, DM alpha chain | 38   | 1                                 | Immunological response            |
|              |    | NID1_HUMAN                                      | Nidogen-1                                               | 39   | 1                                 | Transport/binding proteins        |
|              |    | CERU_HUMAN                                      | Ceruloplasmin                                           | 55   | 2                                 | Transport/binding proteins        |
|              |    | A2MG_HUMAN                                      | Alpha-2-macroglobulin                                   | 225  | 19                                | Protein synthesis and degradation |
|              |    | A2RTY6_HUMAN                                    | Inter-alpha (globulin) inhibitor H2                     | 36   | 1                                 | Metabolism                        |
|              |    | FINC_HUMAN                                      | Fibronectin                                             | 59   | 7                                 | Cytoskeleton/mobility             |
|              |    | K1C9_HUMAN                                      | Keratin, type I cytoskeletal 9                          | 45   | 2                                 | Cytoskeleton/mobility             |
|              | 9  | CHK2_HUMAN                                      | Serine/threonine-protein kinase Chk2                    | 0.11 | 1                                 | Cell cycle                        |
|              |    | A2MG_HUMAN                                      | Alpha-2-macroglobulin                                   | 177  | 10                                | Protein synthesis and degradation |
|              |    | CERU_HUMAN                                      | Ceruloplasmin                                           | 42   | 3                                 | Transport/binding proteins        |
|              | 10 | CO3_HUMAN                                       | Complement C3                                           | 217  | 10                                | Immunological response            |
|              |    | FINC_HUMAN                                      | Fibronectin                                             | 35   | 3                                 | Cytoskeleton/mobility             |
|              | 11 | K2C1_HUMAN                                      | Keratin, type II cytoskeletal 1                         | 51   | 4                                 | Cytoskeleton/mobility             |
|              |    | MTMR4_HUMAN                                     | Myotubularin-related protein 4                          | 35   | 1                                 |                                   |
|              |    | A2MG_HUMAN                                      | Alpha-2-macroglobulin                                   | 45   | 3                                 | Protein synthesis and degradation |
|              | 12 | LG3BP_HUMAN                                     | Galectin-3-binding protein                              | 177  | 7                                 | Transport/binding proteins        |
|              | 13 | ALBU_HUMAN                                      | Human serum albumin                                     | 44   | 4                                 | Transport/binding proteins        |
|              |    | CTRO_HUMAN                                      | Citron Rho-interacting kinase                           | 54   | 1                                 | Cell cycle                        |
|              |    | gi 306891                                       | 90 kDa Heat shock protein                               | 44   | 4                                 | Chaperone/stress response         |
| LG3BP_HUMAN  |    | Galectin-3-binding protein                      | 40                                                      | 3    | Transport/binding proteins        |                                   |
| TRFE_HUMAN   |    | Serotransferrin                                 | 73                                                      | 6    | Transport/binding proteins        |                                   |
| A2MG_HUMAN   |    | Alpha-2-macroglobulin                           | 48                                                      | 3    | Protein synthesis and degradation |                                   |
| ARMX2_HUMAN  |    | Armadillo repeat-containing, X-linked protein 2 | 36                                                      | 1    | Transport/binding proteins        |                                   |

|    |             |                                                             |     |    |                                   |
|----|-------------|-------------------------------------------------------------|-----|----|-----------------------------------|
| 14 | TRFE_HUMAN  | Serotransferrin                                             | 289 | 12 | Transport/binding proteins        |
| 15 | TRFE_HUMAN  | Serotransferrin                                             | 540 | 14 | Transport/binding proteins        |
|    | THRB_HUMAN  | Prothrombin                                                 | 38  | 1  | Protein synthesis and degradation |
|    | gi 3282001  | Immunoglobulin heavy chain variable region                  | 37  | 1  | Immunological response            |
|    | NPY5R_HUMAN | Nuropeptide Y receptor type 5                               | 35  | 1  | Signal transduction               |
| 16 | CO3_HUMAN   | Complement C3                                               | 375 | 17 | Immunological response            |
|    | CO4A_HUMAN  | Complement C4-A                                             | 72  | 6  | Immunological response            |
|    | AACT_HUMAN  | Alpha-1-antichymotrypsin                                    | 87  | 5  | Protein synthesis and degradation |
|    | FIBA_HUMAN  | Fibrinogen alpha chain                                      | 38  | 1  | Protein synthesis and degradation |
|    | FETA_HUMAN  | Alpha-fetoprotein                                           | 40  | 2  | Transport/binding proteins        |
|    | TRFE_HUMAN  | Serotransferrin                                             | 146 | 9  | Transport/binding proteins        |
|    | ALBU_HUMAN  | Human serum albumin                                         | 106 | 5  | Transport/binding proteins        |
| 17 | FETA_HUMAN  | Alpha-fetoprotein                                           | 421 | 11 | Transport/binding proteins        |
|    | AACT_HUMAN  | Alpha-1-antichymotrypsin                                    | 54  | 2  | Protein synthesis and degradation |
|    | ALBU_HUMAN  | Human serum albumin                                         | 490 | 15 | Transport/binding proteins        |
|    | K1C9_HUMAN  | Keratin, type I cytoskeletal 9                              | 39  | 1  | Cytoskeleton/mobility             |
| 18 | ALBU_HUMAN  | Human serum albumin                                         | 289 | 11 | Transport/binding proteins        |
|    | FETA_HUMAN  | Alpha-fetoprotein                                           | 332 | 10 | Transport/binding proteins        |
|    | F261_HUMAN  | 6-phosphofructo-2-kinase/fructose-2,6-biphosphatase 1       | 41  | 1  | Metabolism                        |
|    | TOPB1_HUMAN | DNA topoisomerase 2-binding protein 1                       | 36  | 1  | DNA replication/gene regulation   |
| 19 | FETA_HUMAN  | Alpha-fetoprotein                                           | 97  | 7  | Transport/binding proteins        |
|    | ANGT_HUMAN  | Angiotensinogen                                             | 145 | 4  | Signal transduction               |
|    | ALBU_HUMAN  | Human serum albumin                                         | 206 | 11 | Transport/binding proteins        |
|    | FETUA_HUMAN | Alpha-2-HS-glycoprotein                                     | 41  | 1  | Protein synthesis and degradation |
| 20 | A1AT_HUMAN  | Alpha-1-antitrypsin                                         | 312 | 10 | Protein synthesis and degradation |
|    | ANGT_HUMAN  | Angiotensinogen                                             | 145 | 6  | Signal transduction               |
|    | CBPE_HUMAN  | Carboxypeptidase E                                          | 47  | 1  | Protein synthesis and degradation |
|    | SPA11_HUMAN | Serpin A11                                                  | 37  | 2  | Protein synthesis and degradation |
| 21 | A1AT_HUMAN  | Alpha-1-antitrypsin                                         | 250 | 9  | Protein synthesis and degradation |
|    | IDH3A_HUMAN | Isocitrate dehydrogenase [NAD] subunit alpha, mitochondrial | 46  | 1  | Metabolism                        |
|    | FETA_HUMAN  | Alpha-fetoprotein                                           | 43  | 1  | Transport/binding proteins        |
|    | FIBG_HUMAN  | Fibrinogen gamma chain                                      | 49  | 3  | Protein synthesis and degradation |
| 22 | A1AT_HUMAN  | Alpha-1-antitrypsin                                         | 483 | 16 | Protein synthesis and degradation |
|    | APOH_HUMAN  | Beta-2-glycoprotein 1                                       | 49  | 1  | Transport/binding proteins        |
|    | ALBU_HUMAN  | Human serum albumin                                         | 68  | 8  | Transport/binding proteins        |
|    | FETA_HUMAN  | Alpha-fetoprotein                                           | 102 | 6  | Transport/binding proteins        |
|    | K2C1_HUMAN  | Keratin, type II cytoskeletal 1                             | 61  | 8  | Cytoskeleton/mobility             |
|    | IDH3A_HUMAN | Isocitrate dehydrogenase [NAD] subunit alpha, mitochondrial | 48  | 1  | Metabolism                        |

|    |             |                                                          |     |   |                                   |
|----|-------------|----------------------------------------------------------|-----|---|-----------------------------------|
| 23 | PEDF_HUMAN  | Pigment epithelium-derived factor                        | 190 | 5 | Protein synthesis and degradation |
|    | MATN3_HUMAN | Matrilin-3                                               | 73  | 4 | Extracellular matrix              |
|    | ALBU_HUMAN  | Human serum albumin                                      | 59  | 4 | Transport/binding proteins        |
| 24 | K2C1_HUMAN  | Keratin, type II cytoskeletal 1                          | 172 | 8 | Cytoskeleton/mobility             |
|    | PAI1_HUMAN  | Plasminogen activator inhibitor 1                        | 39  | 6 | Protein synthesis and degradation |
|    | ALBU_HUMAN  | Human serum albumin                                      | 66  | 4 | Transport/binding proteins        |
|    | K22E_HUMAN  | Keratin, type II cytoskeletal 2 epidermal                | 95  | 5 | Cytoskeleton/mobility             |
|    | TACC1_HUMAN | Transforming acidic coiled-coil-containing protein 1     | 35  | 1 | Cell cycle                        |
|    | A1AG2_HUMAN | Alpha-1-acid glycoprotein 2                              | 46  | 1 | Immunological response            |
|    | A1AG1_HUMAN | Alpha-1-acid glycoprotein 1                              | 46  | 1 | Immunological response            |
| 25 | AIFM2_HUMAN | Apoptosis-inducing factor 2                              | 37  | 1 | Metabolism                        |
|    | ACTB_HUMAN  | Actin, cytoplasmic 1                                     | 48  | 5 | Cytoskeleton/mobility             |
|    | ADRO_HUMAN  | NADPH:adrenodoxin oxidoreductase, mitochondrial          | 43  | 1 | Metabolism                        |
| 26 | TRFE_HUMAN  | Serotransferrin                                          | 38  | 1 | Transport/binding proteins        |
|    | CO3_HUMAN   | Complement C3                                            | 49  | 3 | Immunological response            |
|    | SPB5_HUMAN  | Serpin B5                                                | 47  | 2 | Cytoskeleton/mobility             |
| 27 | K2C1_HUMAN  | Keratin, type II cytoskeletal 1                          | 38  | 1 | Cytoskeleton/mobility             |
|    | SYNE1_HUMAN | Nesprin-1                                                | 36  | 1 | Cytoskeleton/mobility             |
|    | TNR4_HUMAN  | Tumor necrosis factor receptor superfamily member 4      | 38  | 1 | Immunological response            |
|    | IL1B_HUMAN  | Interleukin-1 beta                                       | 38  | 1 | Signal transduction               |
|    | CLUS_HUMAN  | Clusterin                                                | 37  | 2 | Immunological response            |
| 28 | ALBU_HUMAN  | Human serum albumin                                      | 75  | 3 | Transport/binding proteins        |
|    | APOE_HUMAN  | Apolipoprotein E                                         | 37  | 4 | Transport/binding proteins        |
|    | gi 33318880 | Ig heavy chain variable region, VH3 family               | 43  | 2 | Immunological response            |
|    | gi 266250   | Tetanus toxoid-specific T-cell receptor beta chain       | 42  | 1 | Unknown                           |
| 29 | L1CAM_HUMAN | Neural cell adhesion molecule L1                         | 35  | 1 | Transport/binding proteins        |
|    | ALDOA_HUMAN | Fructose-bisphosphate aldolase A                         | 38  | 1 | Metabolism                        |
|    | APOE_HUMAN  | Apolipoprotein E                                         | 102 | 6 | Transport/binding proteins        |
| 30 | 1B49_HUMAN  | HLA class I histocompatibility antigen, B-49 alpha chain | 43  | 1 | Immunological response            |
|    | 1B50_HUMAN  | HLA class I histocompatibility antigen, B-50 alpha chain | 43  | 1 | Immunological response            |
|    | 1B45_HUMAN  | HLA class I histocompatibility antigen, B-45 alpha chain | 43  | 1 | Immunological response            |
|    | 1B41_HUMAN  | HLA class I histocompatibility antigen, B-41 alpha chain | 43  | 1 | Immunological response            |
|    | ALBU_HUMAN  | Human serum albumin                                      | 77  | 6 | Transport/binding proteins        |
|    | APOE_HUMAN  | Apolipoprotein E                                         | 62  | 4 | Transport/binding proteins        |
|    | IBP1_HUMAN  | Insulin-like growth factor-binding protein 1             | 43  | 2 | Signal transduction               |
| 31 | IBP1_HUMAN  | Insulin-like growth factor-binding protein 1             | 63  | 4 | Signal transduction               |
|    | AMBP_HUMAN  | Protein AMBP                                             | 46  | 2 | Protein synthesis and degradation |
| 32 | IBP1_HUMAN  | Insulin-like growth factor-binding protein 1             | 70  | 5 | Signal transduction               |



|    |              |                                                             |     |    |                                   |
|----|--------------|-------------------------------------------------------------|-----|----|-----------------------------------|
|    | ALBU_HUMAN   | Human serum albumin                                         | 43  | 1  | Transport/binding proteins        |
|    | AMBP_HUMAN   | Protein AMBP                                                | 47  | 1  | Protein synthesis and degradation |
| 33 | ALBU_HUMAN   | Human serum albumin                                         | 48  | 3  | Transport/binding proteins        |
|    | CN180_HUMAN  | Transmembrane protein C14orf180                             | 42  | 1  | Membrane proteins                 |
|    | AMBP_HUMAN   | Protein AMBP                                                | 38  | 1  | Protein synthesis and degradation |
| 34 | APOA1_HUMAN  | Apolipoprotein A-I                                          | 99  | 6  | Transport/binding proteins        |
|    | ALBU_HUMAN   | Human serum albumin                                         | 39  | 2  | Transport/binding proteins        |
|    | FER_HUMAN    | Proto-oncogene tyrosine-protein kinase FER                  | 37  | 2  | Metabolism                        |
|    | gi 46811348  | Immunoglobulin heavy chain CDR3                             | 40  | 1  | Immunological response            |
| 35 | APOA1_HUMAN  | Apolipoprotein A-I                                          | 471 | 15 | Transport/binding proteins        |
|    | CCR6_HUMAN   | C-C chemokine receptor type 6                               | 42  | 1  | Signal transduction               |
| 36 | APOA1_HUMAN  | Apolipoprotein A-I                                          | 40  | 4  | Transport/binding proteins        |
|    | ZN292_HUMAN  | Zinc finger protein 292                                     | 36  | 2  | Transcriptional regulation        |
|    | B0QYE8_HUMAN | Phospholipase A2, group VI (Cytosolic, calcium-independent) | 38  | 1  | Metabolism                        |
| 37 | UBP15_HUMAN  | Ubiquitin carboxyl-terminal hydrolase 15                    | 39  | 1  | Protein synthesis and degradation |
|    | HECD1_HUMAN  | E3 ubiquitin-protein ligase HECTD1                          | 35  | 1  | Protein synthesis and degradation |
|    | ZN787_HUMAN  | Zinc finger protein 787                                     | 38  | 1  | Transcriptional regulation        |
| 38 | K2C1_HUMAN   | Keratin, type II cytoskeletal 1                             | 52  | 4  | Cytoskeleton/mobility             |
|    | K2C1B_HUMAN  | Keratin, type II cytoskeletal 1b                            | 46  | 1  | Cytoskeleton/mobility             |
|    | NOL11_HUMAN  | Nucleolar protein 11                                        | 36  | 2  | DNA replication/gene regulation   |
| 39 | K2C1_HUMAN   | Keratin, type II cytoskeletal 1                             | 46  | 1  | Cytoskeleton/mobility             |
|    | SUIS_HUMAN   | Sucrase-isomaltase, intestinal                              | 39  | 1  | Metabolism                        |
|    | HP1B3_HUMAN  | Heterochromatin protein 1-binding protein 3                 | 49  | 2  | Transcriptional regulation        |
| 40 | K2C1_HUMAN   | Keratin, type II cytoskeletal 1                             | 56  | 4  | Cytoskeleton/mobility             |
|    | K1C10_HUMAN  | Keratin, type I cytoskeletal 10                             | 52  | 1  | Cytoskeleton/mobility             |
|    | gi 169166439 | PRDICTED: HPX-153 homeobox                                  | 38  | 2  | Transcriptional regulation        |
|    | gi 16198460  | GAA protein                                                 | 48  | 1  | Metabolism                        |
| 41 | LTBP1_HUMAN  | Latent-transforming growth factor beta-binding protein 1    | 35  | 2  | Transport/binding proteins        |
|    | SSX4_HUMAN   | Protein SSX4                                                | 44  | 1  | Transcriptional regulation        |
|    | TEX2_HUMAN   | Testis-expressed sequence 2 protein                         | 39  | 1  | Signal transduction               |
| 42 | RET4_HUMAN   | Retinol-binding protein 4                                   | 38  | 2  | Transport/binding proteins        |
| 43 | PPIB_HUMAN   | Peptidyl-prolyl cis-trans isomerase B                       | 43  | 3  | Signal transduction               |
|    | gi 119626643 | Collagen, type XXV, alpha 1, isoform CRA_a                  | 36  | 1  | Protein synthesis and degradation |
|    | SCTR_HUMAN   | Secretin receptor                                           | 38  | 1  | Signal transduction               |
|    | FGFR3_HUMAN  | Fibroblast growth factor receptor 3                         | 35  | 1  | Signal transduction               |
| 44 | LYSC_HUMAN   | Lysozyme C                                                  | 48  | 1  | Protein synthesis and degradation |
|    | ALBU_HUMAN   | Human serum albumin                                         | 39  | 1  | Transport/binding proteins        |

|                 |    |              |                                                               |     |   |                                   |
|-----------------|----|--------------|---------------------------------------------------------------|-----|---|-----------------------------------|
|                 |    | COF1_HUMAN   | Cofilin-1                                                     | 42  | 1 | Cytoskeleton/mobility             |
|                 | 45 | TTHY_HUMAN   | Transthyretin                                                 | 39  | 1 | Transport/binding proteins        |
|                 |    | RNAS4_HUMAN  | Ribonuclease 4                                                | 37  | 1 | DNA replication/gene regulation   |
|                 |    | gi 386772    | Histone H3                                                    | 38  | 3 | DNA replication/gene regulation   |
|                 |    |              |                                                               |     |   |                                   |
|                 | 46 | K2C1_HUMAN   | Keratin, type II cytoskeletal 1                               | 84  | 9 | Cytoskeleton/mobility             |
|                 |    | K1C9_HUMAN   | Keratin, type I cytoskeletal 9                                | 43  | 3 | Cytoskeleton/mobility             |
|                 |    | gi 46811771  | Immunoglobulin heavy chain CDR3                               | 38  | 3 | Immunological response            |
|                 | 47 | LYSC_HUMAN   | Lysozyme C                                                    | 89  | 3 | Protein synthesis and degradation |
|                 | 48 | MYCN_HUMAN   | N-myc proto-oncogene protein                                  | 49  | 1 | Transcription regulation          |
|                 |    | FREM1_HUMAN  | FRAS1-related extracellular matrix protein 1                  | 37  | 1 | Transport/binding proteins        |
|                 |    | GRB10_HUMAN  | Growth factor receptor-bound protein 10                       | 41  | 1 | Signal transduction               |
|                 | 49 | gi 119583891 | Kinesin family member 13B, isoform CRA_b                      | 45  | 1 | Cytoskeleton/mobility             |
|                 |    | gi 619383    | Apolipoprotein D, apoD [human, plasma, Peptide, 246 aa]       | 52  | 5 | Transport/binding proteins        |
| <b>SK-Hep-1</b> | 1  | TSP1_HUMAN   | Thrombospondin-1                                              | 49  | 3 | Cytoskeleton/mobility             |
|                 | 2  | K2C1_HUMAN   | Keratin, type II cytoskeletal 1                               | 126 | 6 | Cytoskeleton/mobility             |
|                 |    | TSP1_HUMAN   | Thrombospondin-1                                              | 41  | 2 | Cytoskeleton/mobility             |
|                 | 3  | FINC_HUMAN   | Fibronectin                                                   | 143 | 9 | Cytoskeleton/mobility             |
|                 |    | EMR1_HUMAN   | EGF-like module-containing mucin-like hormone receptor-like 1 | 36  | 1 | Signal transduction               |
|                 | 4  | TSP1_HUMAN   | Thrombospondin-1                                              | 38  | 1 | Cytoskeleton/mobility             |
|                 |    | L1CAM_HUMAN  | Neural cell adhesion molecule L1                              | 130 | 8 | Membrane proteins                 |
|                 |    | gi 119602648 | Gasdermin domain containing 1, isoform CRA_a                  | 42  | 1 | Unknown                           |
|                 | 6  | FINC_HUMAN   | Fibronectin                                                   | 45  | 4 | Cytoskeleton/mobility             |
|                 | 7  | TSP1_HUMAN   | Thrombospondin-1                                              | 100 | 9 | Cytoskeleton/mobility             |
|                 |    | 31873147     | Interferon gamma receptor 1                                   | 36  | 1 | Immunological response            |
|                 |    | SPRC_HUMAN   | SPARC                                                         | 41  | 1 | Extracellular matrix              |
|                 |    | CL030_HUMAN  | N-terminal acetyltransferase B complex subunit MDM20          | 36  | 1 | Transport/binding proteins        |
|                 |    | FINC_HUMAN   | Fibronectin                                                   | 36  | 2 | Cytoskeleton/mobility             |
|                 | 8  | TSP1_HUMAN   | Thrombospondin-1                                              | 39  | 2 | Cytoskeleton/mobility             |
|                 |    | CO6A1_HUMAN  | Collagen alpha-1 (VI) chain                                   | 37  | 1 | Transport/binding proteins        |
|                 |    | A16L1_HUMAN  | Autophagy-related protein 16-1 APG16 like 1                   | 43  | 1 | Transport/binding proteins        |
|                 |    | DOS_HUMAN    | Protein Dos                                                   | 42  | 1 | Membrane proteins                 |
|                 |    | HS90B_HUMAN  | Heat shock protein HSP 90-beta                                | 42  | 2 | Chaperone/stress response         |
|                 |    | TRAP1_HUMAN  | Heat shock protein 75 kDa, mitochondrial                      | 42  | 1 | Chaperone/stress response         |
|                 | 9  | ITA3_HUMAN   | Integrin alpha-3                                              | 39  | 2 | Cytoskeleton/mobility             |
|                 |    | ZFP57_HUMAN  | Zinc finger protein 57 homolog                                | 64  | 1 | DNA replication/gene regulation   |
|                 |    | IQGA2_HUMAN  | Ras GTPase-activating-like protein IQGAP2                     | 36  | 1 | Signal transduction               |

|    |             |                                               |     |    |                            |
|----|-------------|-----------------------------------------------|-----|----|----------------------------|
|    | LR37A_HUMAN | Leucine-rich repeat-containing protein 37A3   | 36  | 1  | Transport/binding proteins |
|    | PTPRF_HUMAN | Receptor-type tyrosine-protein phosphatase F  | 52  | 4  | Transport/binding proteins |
| 10 | A4_HUMAN    | Amyloid beta A4 protein                       | 44  | 2  | Cytoskeleton/mobility      |
|    | K2C1_HUMAN  | Keratin, type II cytoskeletal 1               | 79  | 4  | Cytoskeleton/mobility      |
|    | K22E_HUMAN  | Keratin, type II cytoskeletal 2 epidermal     | 47  | 3  | Cytoskeleton/mobility      |
|    | CSTN1_HUMAN | Calsyntenin-1                                 | 97  | 5  | Transport/binding proteins |
|    | SPRC_HUMAN  | SPARC                                         | 39  | 1  | Extracellular matrix       |
| 11 | K2C1_HUMAN  | Keratin, type II cytoskeletal 1               | 98  | 5  | Cytoskeleton/mobility      |
|    | LG3BP_HUMAN | Galectin-3-binding protein                    | 55  | 6  | Transport/binding proteins |
|    | K2C8_HUMAN  | Keratin, type II cytoskeletal 8               | 37  | 1  | Cytoskeleton/mobility      |
| 12 | LG3BP_HUMAN | Galectin-3-binding protein                    | 497 | 11 | Transport/binding proteins |
|    | ACTN1_HUMAN | Alpha-actinin-1                               | 55  | 4  | Cytoskeleton/mobility      |
|    | ACTN4_HUMAN | Alpha-actinin-4                               | 50  | 3  | Transport/binding proteins |
|    | SPRC_HUMAN  | SPARC                                         | 39  | 1  | Extracellular matrix       |
|    | QSOX1_HUMAN | Sulfhydryl oxidase 1                          | 35  | 1  | Metabolism                 |
| 13 | CD166_HUMAN | CD166 antigen                                 | 41  | 1  | Signal transduction        |
|    | LG3BP_HUMAN | Galectin-3-binding protein                    | 275 | 10 | Transport/binding proteins |
|    | QSOX1_HUMAN | Sulfhydryl oxidase 1                          | 136 | 7  | Metabolism                 |
|    | ALBU_HUMAN  | Human serum albumin                           | 40  | 2  | Transport/binding proteins |
| 14 | K2C1_HUMAN  | Keratin, type II cytoskeletal 1               | 185 | 9  | Cytoskeleton/mobility      |
|    | MOES_HUMAN  | Moesin                                        | 39  | 1  | Cytoskeleton/mobility      |
|    | RADI_HUMAN  | Radixin                                       | 39  | 1  | Cytoskeleton/mobility      |
|    | EZRI_HUMAN  | Ezrin                                         | 80  | 6  | Cytoskeleton/mobility      |
|    | TGM2_HUMAN  | Protein-glutamine gamma-glutamyltransferase 2 | 41  | 1  | Metabolism                 |
|    | K22E_HUMAN  | Keratin, type II cytoskeletal 2 epidermal     | 84  | 4  | Cytoskeleton/mobility      |
|    | SPRC_HUMAN  | SPARC                                         | 39  | 1  | Extracellular matrix       |
|    | QSOX1_HUMAN | Sulfhydryl oxidase 1                          | 86  | 7  | Metabolism                 |
|    | MYO7A_HUMAN | Myosin-VIIa                                   | 35  | 1  | Cytoskeleton/mobility      |
| 15 | EXT1_HUMAN  | Exostosin-1                                   | 37  | 1  | Metabolism                 |
|    | CL011_HUMAN | Uncharacterized protein C12orf11              | 35  | 1  | Unknown                    |
|    | QSOX1_HUMAN | Sulfhydryl oxidase 1                          | 89  | 6  | Metabolism                 |
|    | TFR1_HUMAN  | Transferrin receptor protein 1                | 45  | 1  | Transport/binding proteins |
|    | FETA_HUMAN  | Alpha-fetoprotein                             | 57  | 2  | Transport/binding proteins |
| 16 | TRFL_HUMAN  | Lactotransferrin                              | 47  | 2  | Transport/binding proteins |
|    | UFO_HUMAN   | Tyrosine protein kinase receptor UFO          | 40  | 2  | Signal transduction        |
|    | MOES_HUMAN  | Moesin                                        | 51  | 1  | Cytoskeleton/mobility      |
| 17 | K2C1_HUMAN  | Keratin, type II cytoskeletal 1               | 35  | 2  | Cytoskeleton/mobility      |
|    | SNX32_HUMAN | Sorting nexin-32                              | 37  | 1  | Unknown                    |

|    |              |                                                             |     |   |                                   |
|----|--------------|-------------------------------------------------------------|-----|---|-----------------------------------|
|    | gi 62896815  | Heat shock 70kDa protein 8 isoform 2 variant                | 113 | 7 | Chaperone/stress response         |
|    | ALBU_HUMAN   | Human serum albumin                                         | 48  | 3 | Transport/binding proteins        |
| 18 | ALBU_HUMAN   | Human serum albumin                                         | 141 | 4 | Transport/binding proteins        |
|    | QSOX1_HUMAN  | Sulfhydryl oxidase 1                                        | 35  | 2 | Metabolism                        |
| 19 | K2C1_HUMAN   | Keratin, type II cytoskeletal 1                             | 36  | 3 | Cytoskeleton/mobility             |
|    | ALBU_HUMAN   | Human serum albumin                                         | 39  | 1 | Transport/binding proteins        |
|    | AF273054_1   | CTCL tumor antigen                                          | 37  | 1 | Transport/binding proteins        |
|    | CJ118_HUMAN  | Uncharacterized protein C10orf118                           | 35  | 1 | Unknown                           |
|    | PDIA1_HUMAN  | Protein disulfide-isomerase                                 | 39  | 1 | Chaperone/stress response         |
|    | K0284_HUMAN  | Protein KIAA0284                                            | 37  | 1 | Unknown                           |
| 20 | KPYM_HUMAN   | Pyruvate kinase isozymes M1/M2                              | 78  | 4 | Metabolism                        |
|    | Q96JS8_HUMAN | ZNF589 protein                                              | 49  | 1 | DNA replication/gene regulation   |
|    | gi 340021    | Alpha-tubulin                                               | 61  | 4 | Cytoskeleton/mobility             |
| 21 | gi 340021    | Alpha-tubulin                                               | 281 | 6 | Cytoskeleton/mobility             |
|    | INADL_HUMAN  | InaD like protein                                           | 42  | 2 | Transport/binding proteins        |
|    | K22E_HUMAN   | Keratin, type II cytoskeletal 2 epidermal                   | 62  | 2 | Cytoskeleton/mobility             |
|    | K2C1_HUMAN   | Keratin, type II cytoskeletal 1                             | 60  | 3 | Cytoskeleton/mobility             |
| 22 | gi 37492     | Alpha-tubulin                                               | 38  | 2 | Cytoskeleton/mobility             |
|    | EF1A1_HUMAN  | Elongation factor 1-alpha 1                                 | 121 | 6 | Protein synthesis and degradation |
|    | NGN3_HUMAN   | Neurogenin-3                                                | 69  | 1 | Protein synthesis and degradation |
| 23 | ENOA_HUMAN   | Alpha-enolase                                               | 98  | 3 | Metabolism                        |
|    | ENOG_HUMAN   | Gamma-enolase                                               | 46  | 1 | Metabolism                        |
|    | gi 338695    | Beta-tubulin                                                | 52  | 4 | Cytoskeleton/mobility             |
|    | VIGLN_HUMAN  | Vigilin                                                     | 37  | 1 | Metabolism                        |
|    | GDN_HUMAN    | Glia-derived nexin                                          | 54  | 4 | Protein synthesis and degradation |
|    | ENOA_HUMAN   | Alpha-enolase                                               | 264 | 5 | Metabolism                        |
|    | EF1A1_HUMAN  | Elongation factor 1-alpha 1                                 | 54  | 3 | Protein synthesis and degradation |
|    | EF1A2_HUMAN  | Elongation factor 1-alpha 2                                 | 51  | 1 | Protein synthesis and degradation |
|    | IF4A1_HUMAN  | Eukaryotic initiation factor 4A-I                           | 47  | 1 | Protein synthesis and degradation |
|    | IF4A2_HUMAN  | Eukaryotic initiation factor 4A-II                          | 47  | 1 | Protein synthesis and degradation |
|    | HAUS6_HUMAN  | HAUS augmin-like complex subunit 6                          | 45  | 1 | Cell cycle                        |
| 24 | TRFL_HUMAN   | Lactotransferrin                                            | 47  | 2 | Transport/binding proteins        |
|    | UFO_HUMAN    | Tyrosine-protein kinase receptor UFO                        | 40  | 2 | Signal transduction               |
|    | ENOG_HUMAN   | Gamma-enolase                                               | 56  | 2 | Metabolism                        |
|    | ENOA_HUMAN   | Alpha-enolase                                               | 104 | 5 | Metabolism                        |
|    | PAII_HUMAN   | Plasminogen activator inhibitor 1                           | 83  | 5 | Protein synthesis and degradation |
| 25 | CATB_HUMAN   | Cathepsin B                                                 | 37  | 1 | Protein synthesis and degradation |
|    | ANS1B_HUMAN  | Ankyrin repeat and sterile alpha motif domain-containing 1B | 83  | 1 | Protein synthesis and degradation |

|  |    |              |                                                                            |     |   |                                   |
|--|----|--------------|----------------------------------------------------------------------------|-----|---|-----------------------------------|
|  |    | SPRC_HUMAN   | SPARC                                                                      | 39  | 1 | Extracellular matrix              |
|  |    | PTX3_HUMAN   | Pentraxin-related protein PTX3                                             | 56  | 1 | Immunological response            |
|  |    | ACTG_HUMAN   | Actin, cytoplasmic 2                                                       | 91  | 3 | Cytoskeleton/mobility             |
|  |    | ACTB_HUMAN   | Actin, cytoplasmic 1                                                       | 362 | 8 | Cytoskeleton/mobility             |
|  |    | ACTG_HUMAN   | Actin, cytoplasmic 2                                                       | 189 | 4 | Cytoskeleton/mobility             |
|  |    | POTEE_HUMAN  | POTE ankyrin domain family member E                                        | 162 | 5 | Membrane protein                  |
|  |    | Q5T8M8_HUMAN | Actin, alpha 1, skeletal muscle                                            | 219 | 7 | Cytoskeleton/mobility             |
|  | 26 | K2C1_HUMAN   | Keratin, type II cytoskeletal 1                                            | 39  | 4 | Cytoskeleton/mobility             |
|  |    | gi 181192    | preprocathepsin B                                                          | 44  | 2 | Protein synthesis and degradation |
|  |    | VIME_HUMAN   | Vimentin                                                                   | 48  | 2 | Cytoskeleton/mobility             |
|  |    | RSSA_HUMAN   | 40S ribosomal protein SA                                                   | 44  | 2 | Protein synthesis and degradation |
|  |    | SPRC_HUMAN   | SPARC                                                                      | 44  | 2 | Extracellular matrix              |
|  | 27 | SPRC_HUMAN   | SPARC                                                                      | 40  | 1 | Extracellular matrix              |
|  |    | NDF4_HUMAN   | Neurogenic differentiation factor 4                                        | 41  | 1 | Protein synthesis and degradation |
|  | 28 | SPRC_HUMAN   | SPARC                                                                      | 40  | 2 | Extracellular matrix              |
|  |    | EPCR_HUMAN   | Endothelial protein C receptor                                             | 43  | 1 | Immunological response            |
|  |    | ALDOA_HUMAN  | Fructose-bisphosphate aldolase A                                           | 38  | 1 | Metabolism                        |
|  | 29 | SPRC_HUMAN   | SPARC                                                                      | 40  | 1 | Extracellular matrix              |
|  |    | ROA2_HUMAN   | Heterogeneous nuclear ribonucleoproteins A2/B1                             | 39  | 1 | DNA replication/gene regulation   |
|  |    | TOP2B_HUMAN  | DNA topoisomerase 2-beta                                                   | 36  | 1 | DNA replication/gene regulation   |
|  | 30 | G3P_HUMAN    | Glyceraldehyde-3-phosphate dehydrogenase                                   | 38  | 2 | Metabolism                        |
|  | 31 | LDHA_HUMAN   | L-lactate dehydrogenase A chain                                            | 49  | 3 | Metabolism                        |
|  | 32 | K1C9_HUMAN   | Keratin, type I cytoskeletal 9                                             | 43  | 4 | Cytoskeleton/mobility             |
|  |    | K2C1_HUMAN   | Keratin, type II cytoskeletal 1                                            | 37  | 3 | Cytoskeleton/mobility             |
|  |    | LANC3_HUMAN  | LanC-like protein 3                                                        | 35  | 2 | Protein synthesis and degradation |
|  |    | gi 189481    | p58/GTA protein kinase                                                     | 42  | 1 | Cell cycle                        |
|  | 33 | RNF17_HUMAN  | RING finger protein 17                                                     | 37  | 1 | Protein synthesis and degradation |
|  |    | gi 86438948  | Immunoglobulin heavy chain                                                 | 41  | 1 | Immunological response            |
|  |    | Q6P6B6_HUMAN | ZNFX1 protein                                                              | 36  | 1 | Unknown                           |
|  |    | MLE1_HUMAN   | Myosin light chain 1, skeletal muscle isoform                              | 48  | 1 | Cytoskeleton/mobility             |
|  | 34 | TIMP1_HUMAN  | Metalloproteinase inhibitor 1                                              | 44  | 2 | Protein synthesis and degradation |
|  |    | Q8WU60_HUMAN | NADH dehydrogenase (Ubiquinone) flavoprotein 3, 10kDa                      | 43  | 1 | Metabolism                        |
|  |    | gi 2623068   | Yotiao                                                                     | 37  | 1 | Metabolism                        |
|  |    | VIP2_HUMAN   | Inositol hexakisphosphate and diphosphoinositol-pentakisphosphate kinase 2 | 38  | 1 | Metabolism                        |
|  |    | gi 553309    | Golgin-165                                                                 | 38  | 1 | Unknown                           |
|  | 35 | TIMP1_HUMAN  | Metalloproteinase inhibitor 1                                              | 48  | 1 | Protein synthesis and degradation |
|  | 36 | TIMP1_HUMAN  | Metalloproteinase inhibitor 1                                              | 48  | 2 | Protein synthesis and degradation |

|    |              |                                                     |     |    |                                   |
|----|--------------|-----------------------------------------------------|-----|----|-----------------------------------|
|    | OTOF_HUMAN   | Otoferlin                                           | 36  | 1  | Membrane protein                  |
|    | gi 38383015  | TAF3 protein                                        | 39  | 1  | Protein synthesis and degradation |
|    | gi 2181869   | DFFRY                                               | 35  | 1  | Protein synthesis and degradation |
| 37 | AFF4_HUMAN   | AF4/FMR2 family member 4                            | 41  | 1  | Protein synthesis and degradation |
|    | DOK3_HUMAN   | Docking protein 3                                   | 48  | 1  | Protein synthesis and degradation |
|    | F154A_HUMAN  | Protein FAM154A                                     | 40  | 1  | Unknown                           |
|    | K1C9_HUMAN   | Keratin, type I cytoskeletal 9                      | 38  | 1  | Cytoskeleton/mobility             |
|    | LRP1B_HUMAN  | Low-density lipoprotein receptor-related protein 1B | 37  | 1  | Transport/binding protein         |
| 38 | 34528479     | Unnamed protein product                             | 38  | 1  | Unknown                           |
| 39 | K2C1_HUMAN   | Keratin, type II cytoskeletal 1                     | 80  | 5  | Cytoskeleton/mobility             |
|    | TSR1_HUMAN   | Pre-rRNA-processing protein TSR1 homolog            | 52  | 1  | Transport/binding protein         |
|    | ZKSC3_HUMAN  | Zinc finger with KRAB and SCAN domains 3            | 50  | 1  | Protein synthesis and degradation |
| 40 | FXL19_HUMAN  | F-box/LRR-repeat protein 19                         | 48  | 1  | DNA replication/gene regulation   |
| 41 | MYT2_HUMAN   | Replication initiation-like protein                 | 37  | 1  | DNA replication/gene regulation   |
|    | K2C1_HUMAN   | Keratin, type II cytoskeletal 1                     | 81  | 7  | Cytoskeleton/mobility             |
|    | TIMP2_HUMAN  | Metalloproteinase inhibitor 2 precursor             | 43  | 4  | Protein synthesis and degradation |
| 42 | NDK8_HUMAN   | Putative nucleoside diphosphate kinase              | 36  | 1  | Metabolism                        |
|    | Q32Q12_HUMAN | Nucleoside diphosphate kinase                       | 39  | 3  | Metabolism                        |
|    | gi 67190163  | Proteoglycan 4 isoform A                            | 42  | 1  | Transport/binding protein         |
|    | ZN256_HUMAN  | Zinc finger protein 256                             | 38  | 1  | Cell cycle                        |
| 43 | K2C1_HUMAN   | Keratin type II cytoskeletal 1                      | 185 | 11 | Cytoskeleton/mobility             |
|    | RAP1A_HUMAN  | Ras-related protein Rap-1A                          | 42  | 1  | Cell cycle                        |
|    | RAP1B_HUMAN  | Ras-related protein Rap-1b                          | 42  | 1  | Cell cycle                        |
|    | 825723       | tropomyosin 227 AA                                  | 42  | 1  | Cytoskeleton/mobility             |
|    | K1C9_HUMAN   | Keratin, type I cytoskeletal 9                      | 97  | 5  | Cytoskeleton/mobility             |
|    | PPIB_HUMAN   | Peptidylprolyl cistrans isomerase B                 | 63  | 4  | Metabolism                        |
| 44 | K2C1_HUMAN   | Keratin, type II cytoskeletal 1                     | 37  | 4  | Cytoskeleton/mobility             |
|    | K1H5_HUMAN   | Keratin, type I cuticular Ha5                       | 43  | 1  | Cytoskeleton/mobility             |
| 45 | K2C1_HUMAN   | Keratin, type II cytoskeletal 1                     | 232 | 12 | Cytoskeleton/mobility             |
|    | PPIA_HUMAN   | Peptidy-prolyl cis-trans isomerase A                | 95  | 3  | Metabolism                        |
|    | COF2_HUMAN   | Cofilin-2                                           | 42  | 2  | Cytoskeleton/mobility             |
|    | COF1_HUMAN   | Cofilin-1                                           | 42  | 2  | Cytoskeleton/mobility             |
|    | Q32Q12_HUMAN | Nucleoside diphosphate kinase                       | 49  | 2  | Metabolism                        |
|    | 114319005    | Transthyretin Homo sapiens                          | 42  | 1  | Transport/binding protein         |
|    | gi 6166493   | Thioredoxin peroxidase PMP20                        | 48  | 2  | Metabolism                        |
| 46 | TTHY_HUMAN   | Transthyretin                                       | 38  | 1  | Membrane protein                  |
|    | PRDX5_HUMAN  | Peroxiredoxin-5, mitochondrial                      | 37  | 3  | Cytoskeleton/mobility             |
|    | CUTA_HUMAN   | Protein CutA                                        | 40  | 2  | Protein synthesis and degradation |

|   |                 |            |                                 |                                                    |                                 |                            |                                   |                       |
|---|-----------------|------------|---------------------------------|----------------------------------------------------|---------------------------------|----------------------------|-----------------------------------|-----------------------|
|   |                 | K2C1_HUMAN | Keratin, type II cytoskeletal 1 | 36                                                 | 2                               | Transport/binding proteins |                                   |                       |
|   |                 | CYTC_HUMAN | Cystatin-C                      | 38                                                 | 2                               | Cytoskeleton/mobility      |                                   |                       |
|   | 47              |            | AT12A_HUMAN                     | Potassium-transporting ATPase alpha chain 2        | 35                              | 1                          | Transport/binding proteins        |                       |
|   |                 |            | HBB_HUMAN                       | Hemoglobin subunit beta                            | 35                              | 1                          | Transport/binding proteins        |                       |
|   |                 |            | PROF1_HUMAN                     | Profilin-1                                         | 178                             | 3                          | Cytoskeleton/mobility             |                       |
|   |                 |            | CYTC_HUMAN                      | Cystatin-C                                         | 37                              | 1                          | Protein synthesis and degradation |                       |
|   |                 |            | H4_HUMAN                        | Histone H4                                         | 42                              | 3                          | DNA replication/gene regulation   |                       |
|   |                 |            | HBB_HUMAN                       | Hemoglobin subunit beta                            | 35                              | 1                          | Transport/binding proteins        |                       |
|   | 48              |            | K2C1_HUMAN                      | Keratin, type II cytoskeletal 1                    | 45                              | 1                          | Cytoskeleton/mobility             |                       |
|   |                 |            | B2MG_HUMAN                      | Beta-2-microglobulin                               | 54                              | 2                          | Transport/binding proteins        |                       |
|   |                 |            | K1C9_HUMAN                      | Keratin, type I cytoskeletal 9                     | 54                              | 1                          | Cytoskeleton/mobility             |                       |
|   |                 |            | CH10_HUMAN                      | 10 kDa heat shock protein, mitochondrial           | 35                              | 1                          | Chaperone/stress response         |                       |
|   |                 |            | DSC3_HUMAN                      | Desmocollin-3                                      | 47                              | 1                          | Transport/binding proteins        |                       |
|   |                 |            | RS28_HUMAN                      | 40S ribosomal protein S28                          | 42                              | 1                          | Protein synthesis and degradation |                       |
|   |                 |            | UBIQ_HUMAN                      | Ubiquitin                                          | 98                              | 3                          | Transport/binding proteins        |                       |
|   |                 |            | UBIQ_HUMAN                      | Ubiquitin                                          | 58                              | 4                          | Transport/binding proteins        |                       |
|   | <b>HCC-S102</b> | 1          |                                 | K1C10_HUMAN                                        | Keratin, type I cytoskeletal 10 | 53                         | 4                                 | Cytoskeleton/mobility |
|   |                 |            |                                 | K2C1_HUMAN                                         | Keratin, type II cytoskeletal 1 | 104                        | 7                                 | Cytoskeleton/mobility |
|   |                 |            |                                 | K2C4_HUMAN                                         | Keratin, type II cytoskeletal 4 | 38                         | 2                                 | Cytoskeleton/mobility |
| 2 |                 |            | 85397980                        | Coiled coil domain containing 144B Homo sapiens    | 37                              | 1                          | Unknown                           |                       |
|   |                 |            | 149363642                       | Coiled coil domain containing 144AHomo sapiens     | 37                              | 1                          | Unknown                           |                       |
|   |                 |            | K2C1_HUMAN                      | Keratin, type II cytoskeletal 1                    | 77                              | 4                          | Cytoskeleton/mobility             |                       |
| 3 |                 |            | IF4G2_HUMAN                     | Eukaryotic translation initiation factor 4 gamma 2 | 35                              | 1                          | Protein synthesis and degradation |                       |
|   |                 |            | XPO2_HUMAN                      | Exportin-2                                         | 35                              | 1                          | Transport/binding proteins        |                       |
| 4 |                 |            | 85397980                        | Coiled coil domain containing 144B Homo sapiens    | 37                              | 1                          | Unknown                           |                       |
|   |                 |            | 149363642                       | Coiled coil domain containing 144AHomo sapiens     | 37                              | 1                          | Unknown                           |                       |
|   |                 |            | K1C9_HUMAN                      | Keratin, type I cytoskeletal 9                     | 35                              | 1                          | Cytoskeleton/mobility             |                       |
|   |                 |            | KIF6_HUMAN                      | Kinesin-like protein KIF6                          | 35                              | 1                          | Cytoskeleton/mobility             |                       |
| 5 |                 |            | GNDS_HUMAN                      | Ral guanine nucleotide dissociation stimulator     | 38                              | 1                          | Signal transduction               |                       |
| 6 |                 |            | ALKB5_HUMAN                     | Alkylated DNA repair protein alkB homolog 5        | 37                              | 1                          | Membrane proteins                 |                       |
|   |                 |            | GGT1_HUMAN                      | Gamma-glutamyltransferase type 1                   | 37                              | 1                          | Metabolism                        |                       |
|   |                 |            | gi 119624248                    | hCG2041343                                         | 38                              | 1                          | Unknown                           |                       |
|   |                 |            | MIB2_HUMAN                      | E3 ubiquitin-protein ligase MIB2                   | 39                              | 2                          | Signal transduction               |                       |
| 7 |                 |            | CO6_HUMAN                       | Complement component C6                            | 45                              | 3                          | Immunological response            |                       |
|   |                 |            | MYH10_HUMAN                     | Myosin-10                                          | 36                              | 1                          | Cytoskeleton/mobility             |                       |
|   |                 |            | COPG2_HUMAN                     | Coatomer subunit gamma-2                           | 38                              | 1                          | Transport/binding proteins        |                       |
| 8 |                 |            | CERU_HUMAN                      | Ceruloplasmin                                      | 49                              | 4                          | Transport/binding proteins        |                       |
|   |                 |            | A2MG_HUMAN                      | Alpha-2-macroglobulin                              | 36                              | 2                          | Protein synthesis and degradation |                       |

|    |              |                                               |     |   |                                   |
|----|--------------|-----------------------------------------------|-----|---|-----------------------------------|
| 9  | K1C10_HUMAN  | Keratin, type I cytoskeletal 10               | 44  | 2 | Cytoskeleton/mobility             |
|    | K1C9_HUMAN   | Keratin, type I cytoskeletal 9                | 40  | 5 | Cytoskeleton/mobility             |
| 10 | K2C1_HUMAN   | Keratin, type II cytoskeletal 1               | 51  | 3 | Cytoskeleton/mobility             |
|    | CSTN1_HUMAN  | Calsyntenin-1                                 | 42  | 2 | Transport/binding proteins        |
|    | ALBU_HUMAN   | Human serum albumin                           | 38  | 2 | Transport/binding proteins        |
| 11 | CSTN1_HUMAN  | Calsyntenin-1                                 | 41  | 1 | Transport/binding proteins        |
|    | LG3BP_HUMAN  | Galectin-3-binding protein                    | 79  | 5 | Transport/binding proteins        |
| 12 | LG3BP_HUMAN  | Galectin-3-binding protein                    | 230 | 8 | Transport/binding proteins        |
|    | EF2_HUMAN    | Elongation factor 2                           | 37  | 1 | Protein synthesis and degradation |
| 13 | HS90B_HUMAN  | Heat shock protein HSP 90-beta                | 39  | 1 | Chaperone/stress response         |
|    | gi 62914009  | HSP90AA1 protein                              | 47  | 4 | Chaperone/stress response         |
|    | LG3BP_HUMAN  | Galectin-3-binding protein                    | 53  | 4 | Transport/binding proteins        |
| 14 | K1C10_HUMAN  | Keratin, type I cytoskeletal 10               | 48  | 1 | Cytoskeleton/mobility             |
|    | HS90B_HUMAN  | Heat shock protein HSP 90-beta                | 52  | 4 | Chaperone/stress response         |
|    | QSOX1_HUMAN  | Sulfhydryl oxidase 1                          | 44  | 4 | Metabolism                        |
|    | EPHB1_HUMAN  | Ephrin type-B receptor 1                      | 42  | 1 | Transport/binding proteins        |
| 15 | RCCD1_HUMAN  | RCC1 domain-containing protein 1              | 41  | 1 | Unknown                           |
|    | K2C1_HUMAN   | Keratin, type II cytoskeletal 1               | 39  | 1 | Cytoskeleton/mobility             |
|    | B4DYM1_HUMAN | cDNA FLJ60372, highly similar to Myosin-18A   | 37  | 1 | Unknown                           |
| 16 | ALBU_HUMAN   | Human serum albumin                           | 69  | 5 | Transport/binding proteins        |
|    | GFAP_HUMAN   | Gliial fibrillary acidic protein              | 40  | 1 | Transport/binding proteins        |
|    | K2C7_HUMAN   | Keratin, type II cytoskeletal 7               | 40  | 1 | Cytoskeleton/mobility             |
|    | K2C8_HUMAN   | Keratin, type II cytoskeletal 8               | 40  | 1 | Cytoskeleton/mobility             |
|    | K2C4_HUMAN   | Keratin, type II cytoskeletal 4               | 40  | 1 | Cytoskeleton/mobility             |
|    | K2C1_HUMAN   | Keratin, type II cytoskeletal 1               | 72  | 1 | Cytoskeleton/mobility             |
| 17 | ALBU_HUMAN   | Human serum albumin                           | 145 | 4 | Transport/binding proteins        |
| 18 | ALBU_HUMAN   | Human serum albumin                           | 135 | 9 | Transport/binding proteins        |
|    | K2C1_HUMAN   | Keratin, type II cytoskeletal 1               | 105 | 6 | Cytoskeleton/mobility             |
|    | R4RL1_HUMAN  | Reticulon-4 receptor-like 1                   | 48  | 1 | Transport/binding proteins        |
|    | IGF1A_HUMAN  | Insulin-like growth factor IA                 | 44  | 1 | DNA replication/gene regulation   |
|    | TIP60_HUMAN  | Histone acetyltransferase KAT5                | 46  | 1 | DNA replication/gene regulation   |
| 19 | S12A7_HUMAN  | Solute carrier family 12 member 7             | 42  | 1 | Transport/binding proteins        |
|    | PCSK9_HUMAN  | Proprotein convertase subtilisin/kexin type 9 | 47  | 2 | Metabolism                        |
|    | UGDH_HUMAN   | UDP-glucose 6-dehydrogenase                   | 46  | 2 | Metabolism                        |
| 20 | FBX37_HUMAN  | F-box only protein 37                         | 37  | 1 | Transport/binding proteins        |
|    | G6PI_HUMAN   | Glucose-6-phosphate isomerase                 | 40  | 5 | Metabolism                        |
| 21 | gi 181965    | Elongation factor 1-alpha                     | 37  | 1 | Protein synthesis and degradation |
| 22 | TBB5_HUMAN   | Tubulin beta chain                            | 49  | 4 | Cytoskeleton/mobility             |



|    |  |              |                                                                    |     |    |                                   |
|----|--|--------------|--------------------------------------------------------------------|-----|----|-----------------------------------|
|    |  | EF1G_HUMAN   | Elongation factor 1-gamma                                          | 46  | 1  | Protein synthesis and degradation |
|    |  | ENOA_HUMAN   | Alpha-enolase                                                      | 39  | 4  | Metabolism                        |
|    |  | EF1G_HUMAN   | Elongation factor 1-gamma                                          | 36  | 1  | Protein synthesis and degradation |
| 23 |  | ENOA_HUMAN   | Alpha-enolase                                                      | 365 | 10 | Metabolism                        |
|    |  | ENOB_HUMAN   | Beta-enolase                                                       | 41  | 1  | Metabolism                        |
|    |  | 6PGD_HUMAN   | 6-phosphogluconate dehydrogenase, decarboxylating                  | 39  | 1  | Metabolism                        |
|    |  | SH3K1_HUMAN  | SH3 domain-containing kinase-binding protein 1                     | 44  | 3  | Signal transduction               |
|    |  | ENOG_HUMAN   | Gamma-enolase                                                      | 177 | 3  | Metabolism                        |
| 24 |  | 6PGD_HUMAN   | 6-phosphogluconate dehydrogenase, decarboxylating                  | 42  | 2  | Metabolism                        |
|    |  | PDE7A_HUMAN  | High affinity cAMP-specific 3', 5'-cyclic phosphodiesterase 7A     | 40  | 1  | Signal transduction               |
|    |  | IDHC_HUMAN   | Isocitrate dehydrogenase [NADP] cytoplasmic                        | 52  | 3  | Metabolism                        |
|    |  | ES8L1_HUMAN  | Epidermal growth factor receptor kinase substrate 8-like protein 1 | 42  | 2  | Cytoskeleton/mobility             |
| 25 |  | ACTBL_HUMAN  | Beta-actin-like protein 2                                          | 35  | 1  | Cytoskeleton/mobility             |
|    |  | ANKS3_HUMAN  | Ankyrin repeat and SAM domain-containing protein 3                 | 35  | 1  | Unknown                           |
|    |  | ACTB_HUMAN   | Actin, cytoplasmic 1                                               | 139 | 5  | Cytoskeleton/mobility             |
|    |  | B2RPJ1_HUMAN | Actin, beta-like 2                                                 | 79  | 3  | Cytoskeleton/mobility             |
| 26 |  | K1C9_HUMAN   | Keratin, type I cytoskeletal 9                                     | 39  | 2  | Cytoskeleton/mobility             |
|    |  | GGH_HUMAN    | Gamma-glutamyl hydrolase                                           | 40  | 1  | Metabolism                        |
|    |  | K1C10_HUMAN  | Keratin, type I cytoskeletal 10                                    | 111 | 4  | Cytoskeleton/mobility             |
|    |  | Q53FF7_HUMAN | CD27-binding (Siva) protein isoform 1 variant                      | 40  | 1  | Transport/binding proteins        |
| 27 |  | MIPT3_HUMAN  | TRAF3-interacting protein 1                                        | 35  | 1  | Signal transduction               |
|    |  | ALDOA_HUMAN  | Fructose-bisphosphate aldolase A                                   | 40  | 1  | Metabolism                        |
|    |  | Q4W5M8_HUMAN | PET112-like (yeast)                                                | 39  | 1  | Protein synthesis and degradation |
|    |  | K1C9_HUMAN   | Keratin, type I cytoskeletal 9                                     | 38  | 1  | Cytoskeleton/mobility             |
| 28 |  | DDX53_HUMAN  | Probable ATP-dependent RNA helicase DDX53                          | 37  | 1  | DNA replication/gene regulation   |
|    |  | ALDOA_HUMAN  | Fructose-bisphosphate aldolase A                                   | 77  | 4  | Metabolism                        |
|    |  | K1C10_HUMAN  | Keratin, type I cytoskeletal 10                                    | 41  | 2  | Cytoskeleton/mobility             |
|    |  | gi 338057    | Sulfated glycoprotein-2                                            | 95  | 3  | Transport/binding proteins        |
|    |  | RLA0_HUMAN   | 60S acidic ribosomal protein P0                                    | 34  | 1  | Transport/binding proteins        |
|    |  | K1C9_HUMAN   | Keratin, type I cytoskeletal 9                                     | 65  | 4  | Cytoskeleton/mobility             |
| 29 |  | K1C10_HUMAN  | Keratin, type I cytoskeletal 10                                    | 40  | 2  | Cytoskeleton/mobility             |
|    |  | K2C1_HUMAN   | Keratin, type II cytoskeletal 1                                    | 73  | 7  | Cytoskeleton/mobility             |
|    |  | ANXA2_HUMAN  | Annexin A2                                                         | 51  | 4  | Cytoskeleton/mobility             |
|    |  | NOSTN_HUMAN  | Nostrin                                                            | 35  | 1  | Transport/binding proteins        |
| 30 |  | G3P_HUMAN    | Glyceraldehyde-3-phosphate dehydrogenase                           | 128 | 7  | Metabolism                        |
|    |  | FGL1_HUMAN   | Fibrinogen-like protein 1                                          | 57  | 1  | Signal transduction               |

|    |              |                                                                 |     |   |                                 |
|----|--------------|-----------------------------------------------------------------|-----|---|---------------------------------|
|    | CHD8_HUMAN   | Chromodomain-helicase-DNA-binding protein 8                     | 38  | 1 | DNA replication/gene regulation |
|    | K2C1B_HUMAN  | Keratin, type II cytoskeletal 1b                                | 45  | 1 | Cytoskeleton/mobility           |
| 31 | FGL1_HUMAN   | Fibrinogen-like protein 1                                       | 83  | 6 | Signal transduction             |
| 32 | K1C13_HUMAN  | Keratin, type I cytoskeletal 13                                 | 48  | 1 | Cytoskeleton/mobility           |
|    | K1C10_HUMAN  | Keratin, type I cytoskeletal 10                                 | 193 | 9 | Cytoskeleton/mobility           |
|    | K2C1_HUMAN   | Keratin, type II cytoskeletal 1                                 | 82  | 7 | Cytoskeleton/mobility           |
|    | ENOA_HUMAN   | Alpha-enolase                                                   | 48  | 1 | Metabolism                      |
| 33 | K2C1_HUMAN   | Keratin, type II cytoskeletal 1                                 | 109 | 7 | Cytoskeleton/mobility           |
|    | K1C10_HUMAN  | Keratin, type I cytoskeletal 10                                 | 35  | 1 | Cytoskeleton/mobility           |
|    | K1C9_HUMAN   | Keratin, type I cytoskeletal 9                                  | 39  | 4 | Cytoskeleton/mobility           |
| 34 | TPIS_HUMAN   | Triosephosphate isomerase                                       | 39  | 2 | Metabolism                      |
|    | CHD1_HUMAN   | Chromodomain-helicase-DNA-binding protein 1                     | 38  | 1 | DNA replication/gene regulation |
|    | gi 119577863 | hCG2041066                                                      | 38  | 1 | Unknown                         |
|    | NSF1C_HUMAN  | NSFL1 cofactor p47                                              | 38  | 1 | Cytoskeleton/mobility           |
| 35 | CP20A_HUMAN  | Cytochrome P450 20A1                                            | 43  | 1 | Metabolism                      |
|    | AGA11_HUMAN  | Arf-GAP, GTPase, ANK repeat and PH domain-containing protein 11 | 40  | 1 | Metabolism                      |
|    | K2C1_HUMAN   | Keratin, type II cytoskeletal 1                                 | 42  | 4 | Cytoskeleton/mobility           |
| 36 | Q5VY93_HUMAN | Rho/rac guanine nucleotide exchange factor (GEF) 2              | 39  | 1 | Signal transduction             |
|    | CF223_HUMAN  | Uncharacterized protein C6orf223                                | 42  | 2 | Unknown                         |
|    | gi 119622046 | hCG1646228                                                      | 42  | 1 | Unknown                         |
|    | Q8TEM7_HUMAN | FLJ00166 protein                                                | 41  | 1 | DNA replication/gene regulation |
| 37 | K22E_HUMAN   | Keratin, type II cytoskeletal 2 epidermal                       | 38  | 2 | Cytoskeleton/mobility           |
|    | K2C1_HUMAN   | Keratin, type II cytoskeletal 1                                 | 36  | 2 | Cytoskeleton/mobility           |
|    | FIGL1_HUMAN  | Fidgetin-like protein 1                                         | 38  | 1 | Metabolism                      |
| 38 | GDF15_HUMAN  | Growth/differentiation factor 15                                | 40  | 1 | Signal transduction             |
|    | K1C9_HUMAN   | Keratin, type I cytoskeletal 9                                  | 36  | 2 | Cytoskeleton/mobility           |
|    | PRDX1_HUMAN  | Peroxiredoxin-1                                                 | 35  | 2 | Transport/binding proteins      |
| 39 | K2C1_HUMAN   | Keratin, type II cytoskeletal 1                                 | 70  | 4 | Cytoskeleton/mobility           |
|    | EPHB1_HUMAN  | Ephrin type-B receptor 1                                        | 41  | 2 | Transport/binding proteins      |
|    | gi 6643713   | Immunoglobulin V lambda/J lambda light chain                    | 42  | 1 | Immunological response          |
|    | K1C9_HUMAN   | Keratin, type I cytoskeletal 9                                  | 42  | 2 | Cytoskeleton/mobility           |
| 40 | K2C1_HUMAN   | Keratin, type II cytoskeletal 1                                 | 46  | 2 | Cytoskeleton/mobility           |
|    | Q3SYD4_HUMAN | SSX4 protein                                                    | 35  | 1 | DNA replication/gene regulation |
|    | AP2B_HUMAN   | Transcription factor AP-2 beta                                  | 35  | 1 | DNA replication/gene regulation |
|    | ZN536_HUMAN  | Zinc finger protein 536                                         | 35  | 1 | DNA replication/gene regulation |
| 41 | EMIL1_HUMAN  | EMILIN-1                                                        | 42  | 2 | Cytoskeleton/mobility           |
|    | ZN511_HUMAN  | Zinc finger protein 511                                         | 41  | 1 | DNA replication/gene regulation |

|    |  |              |                                                       |     |   |                                   |
|----|--|--------------|-------------------------------------------------------|-----|---|-----------------------------------|
|    |  | K2C1_HUMAN   | Keratin, type II cytoskeletal 1                       | 41  | 2 | Cytoskeleton/mobility             |
| 42 |  | K2C1_HUMAN   | Keratin, type II cytoskeletal 1                       | 41  | 4 | Cytoskeleton/mobility             |
|    |  | Q9H2G3_HUMAN | CTCL tumor antigen se20-7                             | 42  | 2 | Unknown                           |
|    |  | RGL1_HUMAN   | Ral guanine nucleotide dissociation stimulator-like 1 | 42  | 2 | Signal transduction               |
|    |  | BAI1_HUMAN   | Brain-specific angiogenesis inhibitor 1               | 37  | 2 | Signal transduction               |
|    |  | ZN787_HUMAN  | Zinc finger protein 787                               | 43  | 1 | DNA replication/gene regulation   |
| 43 |  | E41L2_HUMAN  | Band 4.1-like protein 2                               | 39  | 2 | Membrane proteins                 |
|    |  | ZPR1_HUMAN   | Zinc finger protein ZPR1                              | 38  | 2 | DNA replication/gene regulation   |
|    |  | HERC2_HUMAN  | Probable E3 ubiquitin-protein ligase HERC2            | 38  | 1 | Transport/binding proteins        |
|    |  | K2C1B_HUMAN  | Keratin, type II cytoskeletal 1b                      | 47  | 1 | Cytoskeleton/mobility             |
| 44 |  | MCES_HUMAN   | mRNA cap guanine-N7 methyltransferase                 | 54  | 1 | DNA replication/gene regulation   |
|    |  | PPIA_HUMAN   | Peptidyl-prolyl cis-trans isomerase A                 | 52  | 2 | Protein synthesis and degradation |
| 45 |  | ZDBF2_HUMAN  | DBF4-type zinc finger-containing protein 2            | 35  | 2 | Unknown                           |
|    |  | PERI_HUMAN   | Peripherin                                            | 41  | 1 | Cytoskeleton/mobility             |
|    |  | PPIA_HUMAN   | Peptidyl-prolyl cis-trans isomerase A                 | 39  | 2 | Protein synthesis and degradation |
| 46 |  | K2C1_HUMAN   | Keratin, type II cytoskeletal 1                       | 37  | 1 | Cytoskeleton/mobility             |
|    |  | THIO_HUMAN   | Thioredoxin                                           | 38  | 3 | Transport/binding proteins        |
|    |  | gi 169176438 | PREDICTED: hypothetical protein                       | 35  | 1 | Unknown                           |
|    |  | H4_HUMAN     | Histone H4                                            | 38  | 2 | DNA replication/gene regulation   |
| 47 |  | THIO_HUMAN   | Thioredoxin                                           | 39  | 1 | Transport/binding proteins        |
|    |  | gi 171853445 | Immunoglobulin heavy chain variable region            | 38  | 1 | Immunological response            |
|    |  | CO5A1_HUMAN  | Collagen alpha-1(V) chain                             | 37  | 1 | Protein synthesis and degradation |
| 48 |  | K2C1_HUMAN   | Keratin, type II cytoskeletal 1                       | 119 | 6 | Cytoskeleton/mobility             |
|    |  | UBIQ_HUMAN   | Ubiquitin                                             | 52  | 4 | Transport/binding proteins        |
